# Supplementary material for: Nucleobase derived boron and nitrogen co-doped carbon nanosheets as efficient catalysts for selective oxidation and reduction reactions
Source: Royal Society of Chemistry journal article supplement (doi:10.1039/d0nr00516a), 2020-01-01
Supplement: d0nr00516a1.pdf [file d0nr00516a1.pdf]

## Supporting information

### **Nucleobase Derived Boron and Nitrogen co-doped Carbon Nanosheets as Efficient Catalyst for Selective Oxidation and Reduction Reactions**

Guangming Wang,<sup>a</sup> Peng Wang,<sup>a</sup> Xuefei Zhang,<sup>a</sup> Qiao-Hua Wei,<sup>a</sup> Shuchang Wu<sup>\*b</sup>  
and Zilai Xie<sup>\*a</sup>

[a] G. Wang, P. Wang, X. Zhang, Q. H. Wei, Prof. Dr. Z. Xie

College of Chemistry, Fuzhou University, 2 Xueyuan Road, Fuzhou 350116, China

[b] Dr. S. Wu

School of Pharmaceutical and Materials Engineering, Taizhou University, Taizhou  
318000, Zhejiang Province, China

\* Corresponding author. E-mail: [zlxie@fzu.edu.cn](mailto:zlxie@fzu.edu.cn)

[scwu10b@alum.imr.ac.cn](mailto:scwu10b@alum.imr.ac.cn)

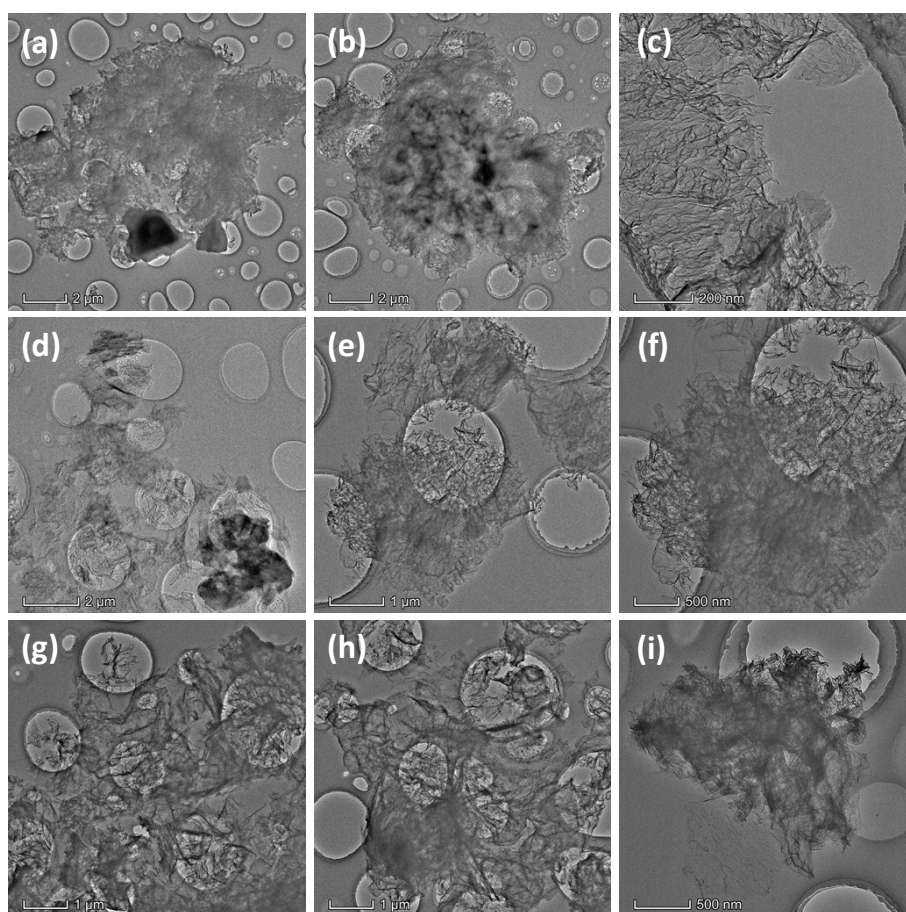

Figure S1. TEM images of the spent BNC (a-c), BNC-2 (d-f) and BNC-1 (g-i)

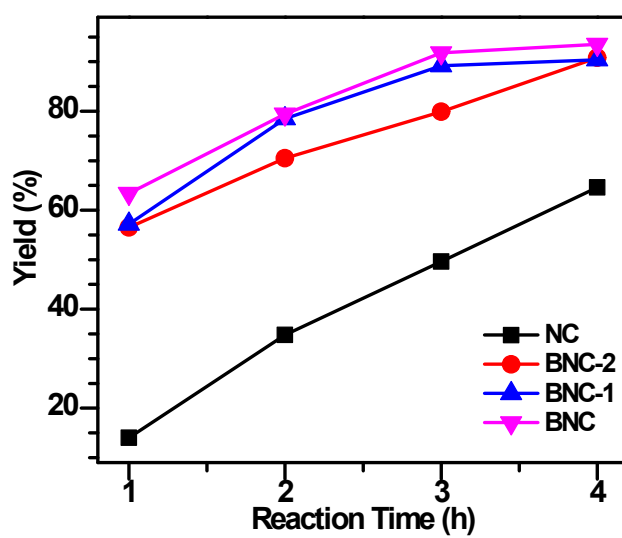

Figure S2. The performance of each catalyst for the reduction of nitrobenzene  
 Conditions: 10 mg of catalyst, 5 mmol of nitrobenzene, 4 equivalent of hydrazine

hydrate, 100 °C.

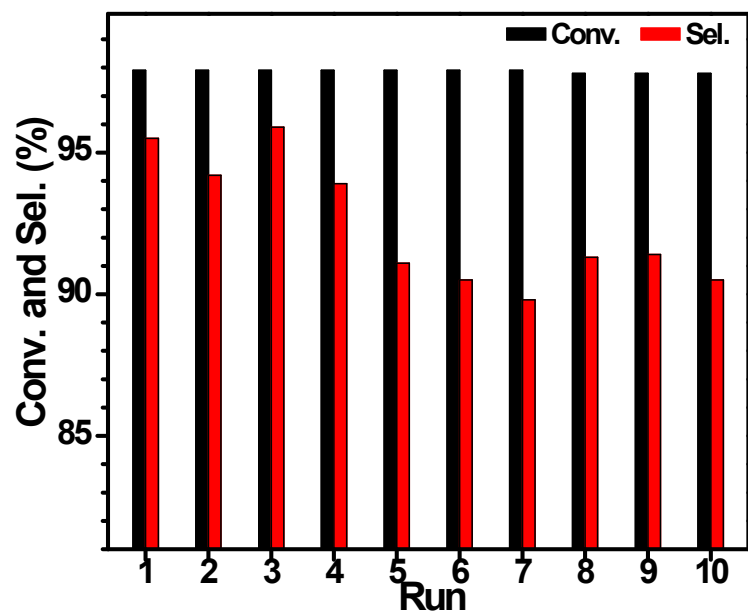

Figure S3. Recyclability of BNC in the reduction of nitrobenzene
